# Supplementary material for: Influence of AAV vector tropism on long-term expression and Fc-γ receptor binding of an antibody targeting SARS-CoV-2
Source: PubMed Central journal article supplement (PMC11250830; doi:10.1038/s42003-024-06529-3), 2024-07-16
Supplement: 42003_2024_6529_MOESM2_ESM.pdf [file 42003_2024_6529_MOESM2_ESM.pdf]

## Supplementary Information

### **Influence of AAV vector tropism on long-term expression and Fc- $\gamma$ receptor binding of an antibody targeting SARS-CoV-2**

Jannik T. Wagner<sup>1\*</sup>, Sandra M. Müller-Schmucker<sup>1</sup>, Wenjun Wang<sup>2</sup>, Philipp Arnold<sup>3</sup>, Nadja Uhlig<sup>4</sup>, Leila Issmail<sup>4</sup>, Valentina Eberlein<sup>4</sup>, Dominik Damm<sup>1</sup>, Kaveh Roshanbinfar<sup>5</sup>, Armin Ensser<sup>1</sup>, Friederike Oltmanns<sup>1</sup>, Antonia Sophia Peter<sup>1</sup>, Vladimir Temchura<sup>1</sup>, Silke Schrödel<sup>6</sup>, Felix B. Engel<sup>5</sup>, Christian Thirion<sup>6</sup>, Thomas Grunwald<sup>4</sup>, Manfred Wuhrer<sup>2</sup>, Dirk Grimm<sup>7</sup>, Klaus Überla<sup>1\*</sup>

Inventory of supplementary information

- Figure S1:     Uncropped blot images
- Figure S2:     Transmission electron microscopic (TEM) visualisation of AAV vector particles
- Figure S3:     TRES6 serum concentrations in challenged animals
- Figure S4:     Anti-drug T cell responses
- Figure S5:     Murine IgG2c Fc-glycosylation of AAV8 encoded antibodies
- Figure S6:     Murine IgG2c Fc-glycosylation of AAVMYO encoded antibodies
- Figure S7:     Changes in Fc- $\gamma$  receptor binding over time
- Table S1:     Transcriptomic expression analysis of genes associated with glycosylation pathways
- Figure S8:     Gating strategy for flow cytometry based antibody-binding assays
- Figure S9:     Gating strategy for the analysis of anti-drug T cell responses

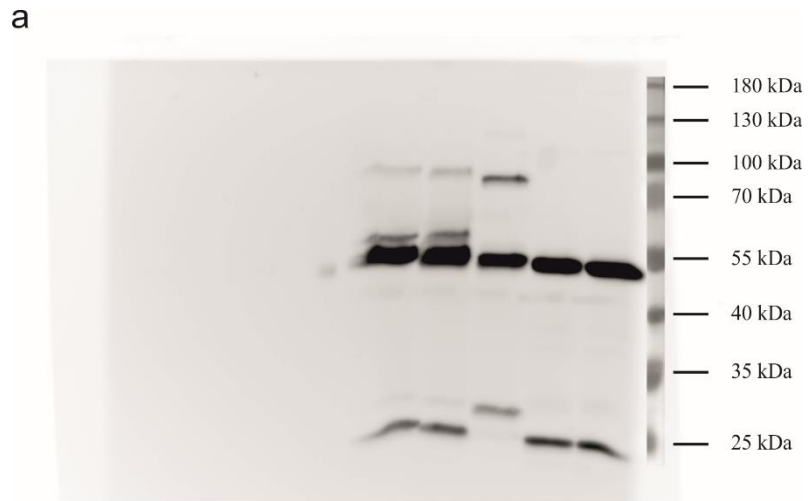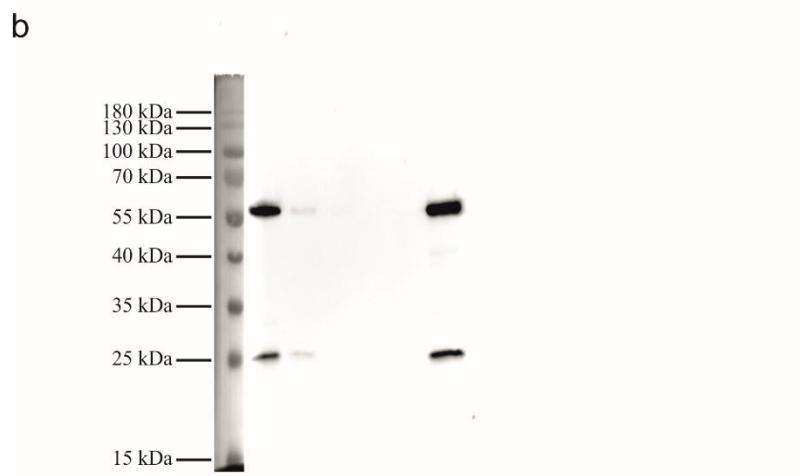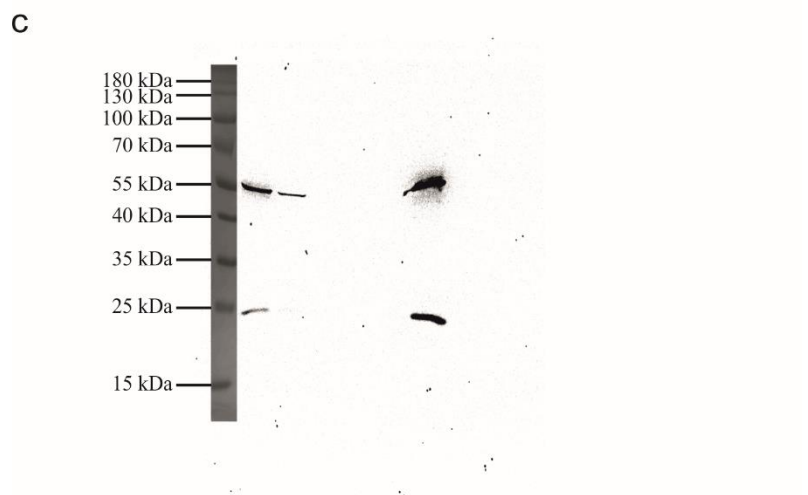

**Figure S1 Uncropped blot images.** Shown are the uncropped western blot images of Fig. 2a (a), Fig. 2c (b) and Fig. 2d (c).

**A**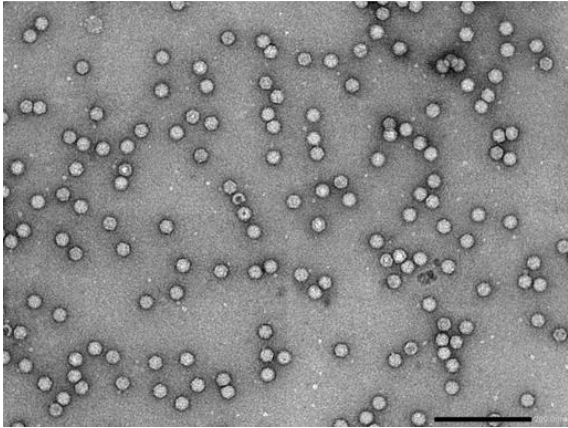**B**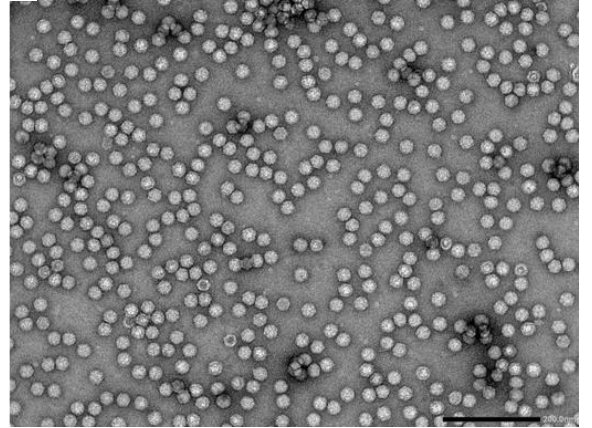

*Figure S2. Transmission electron microscopic (TEM) visualisation of AAV vector particles. AAV8 (A) and AAVMYO (B) vector particles were imaged by negative stain transmission electron microscopy. The scale bar represents 200 nm.*

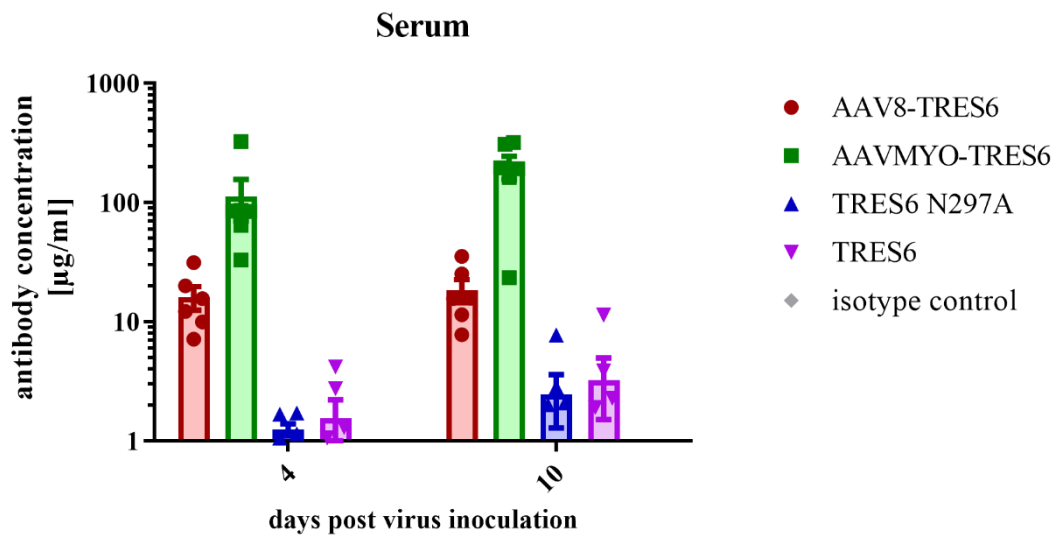

*Figure S3. TRES6 serum concentrations in challenged animals. The antibody concentration was determined in the sera of the challenged animals (n=6, ♀ = 6) on the indicated days after virus inoculation. The bars represent the mean antibody concentration of each group +SEM.*

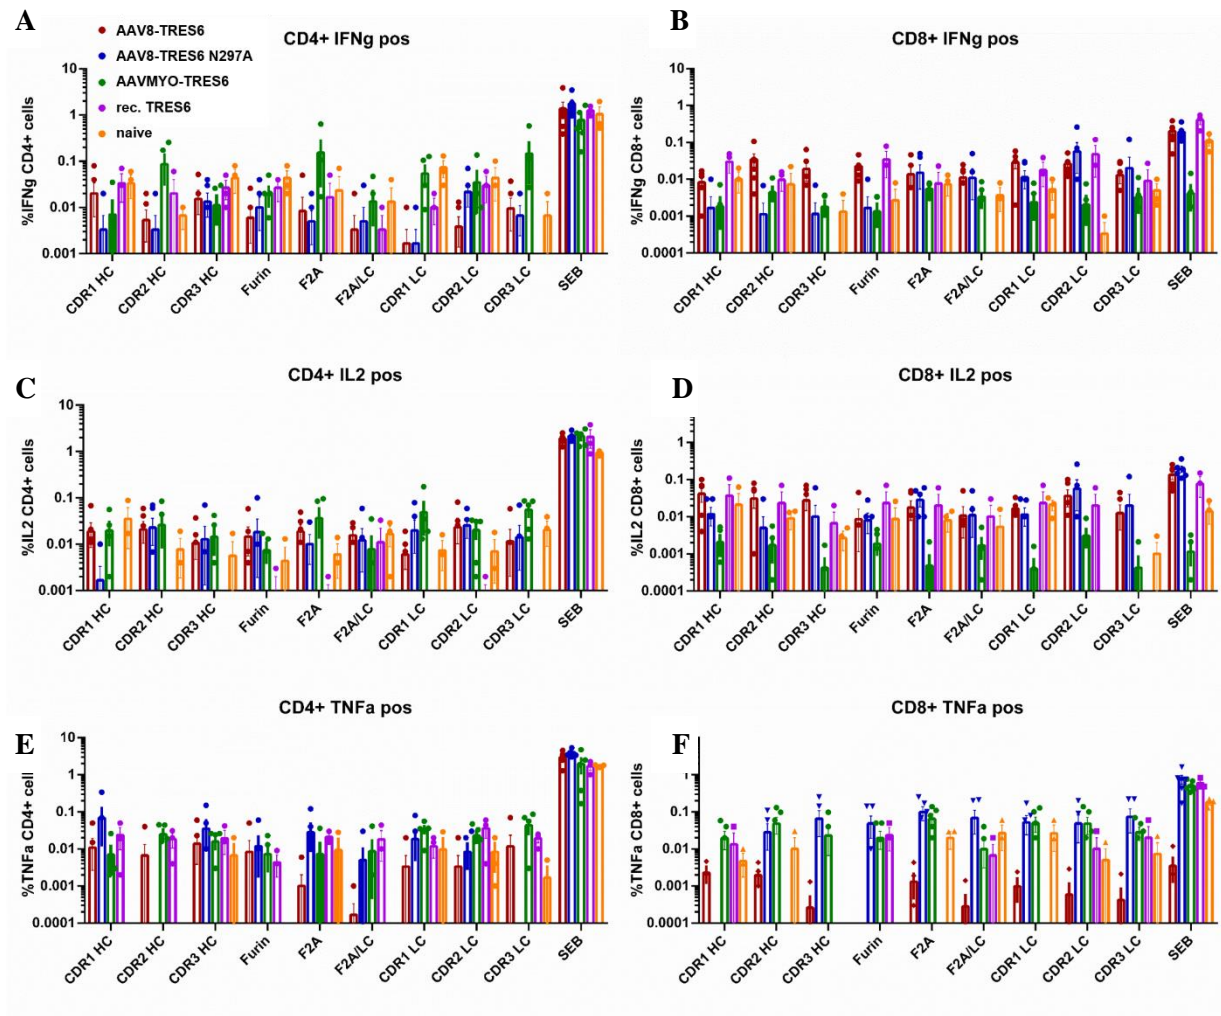

**Figure S4. Anti-drug T cell responses.** Splenocytes were obtained from mice 52 weeks after administration of AAV vector particles, recombinant TRES6 or naïve animals (AAV vector group size  $n = 6$ , ♀ = 3, ♂ = 3; TRES6 and naïve group size  $n = 3$ , ♀ = 2, ♂ = 1) and restimulated with peptides spanning antibody fragments with the highest immunogenic potential. Each dot represents results from a single mouse. The bars show for each group (red: AAV8-TRES6, blue: AAV8-TRES6 N297A, green: AAVMYO-TRES6, pink: recombinant TRES6, yellow: naïve) the mean percentage of CD4 positive cells that are IFN $\gamma$  (A), IL2 (C) or TNF $\alpha$  (E) positive and of CD8 positive cells that are IFN $\gamma$  (B), IL2 (D) or TNF $\alpha$  (F) positive. Background activation was determined by stimulation with a DMSO control for each mouse and subtracted. Statistical evaluation of the data was performed by an ordinary Two-way ANOVA test and Dunnett's Pairwise Multiple Comparison Procedures as post hoc test in comparison to the naïve control (not indicated: non-significant).

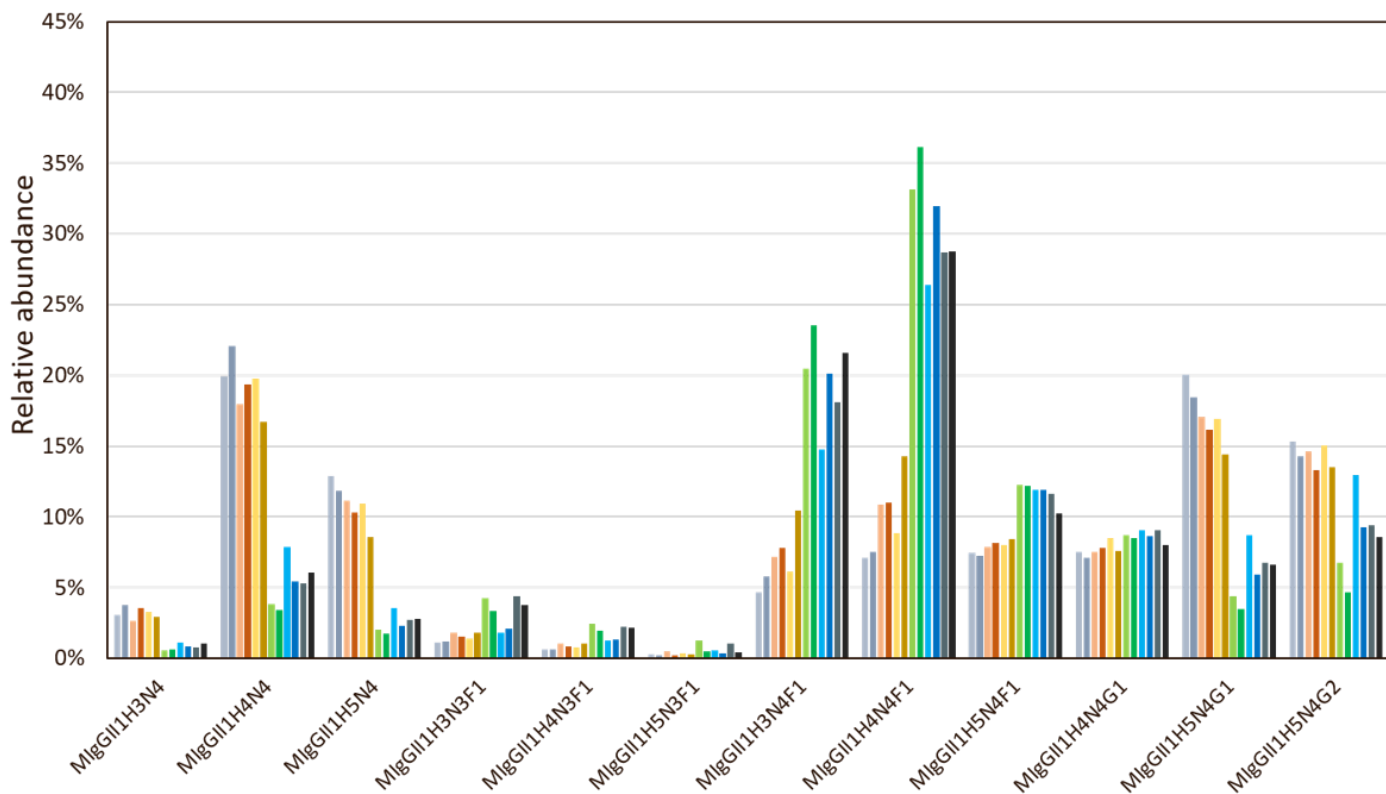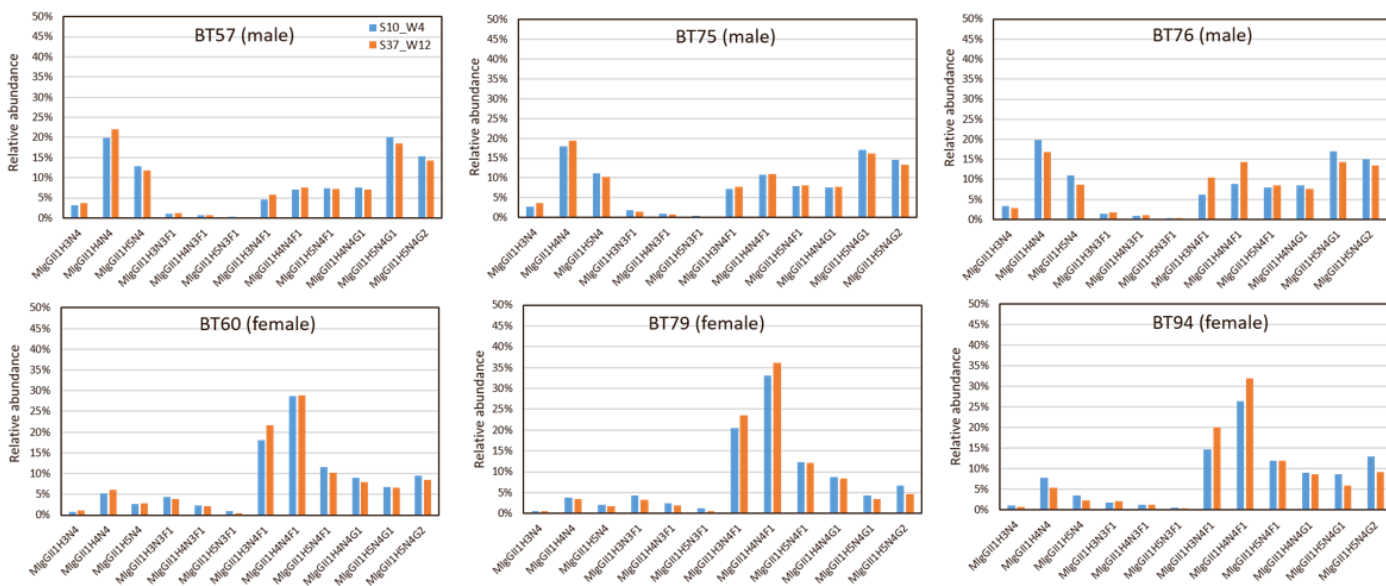

**Figure S5. Murine IgG2c Fc-glycosylation of AAV8 encoded antibodies.** The relative abundance of different glycosylation profiles are shown for each mouse represented as color-coded bars. The proposed glycan structures are based on literature [63]. The matching light and strong colours show the value in week 4 and week 12, respectively, of the long-term experiment. Below, the glycosylation profile is shown for each mouse separately. Here, the blue bar represents week 4 and week 12 is shown in orange. H: hexose; N: N-acetylhexosamine; F: fucose; S: N-acetylneuraminic acid; G: N-glycolylneuraminic acid. Peptide sequence of IgG2a/c:EDYNSTLR. MigGII: Murine IgG2c.

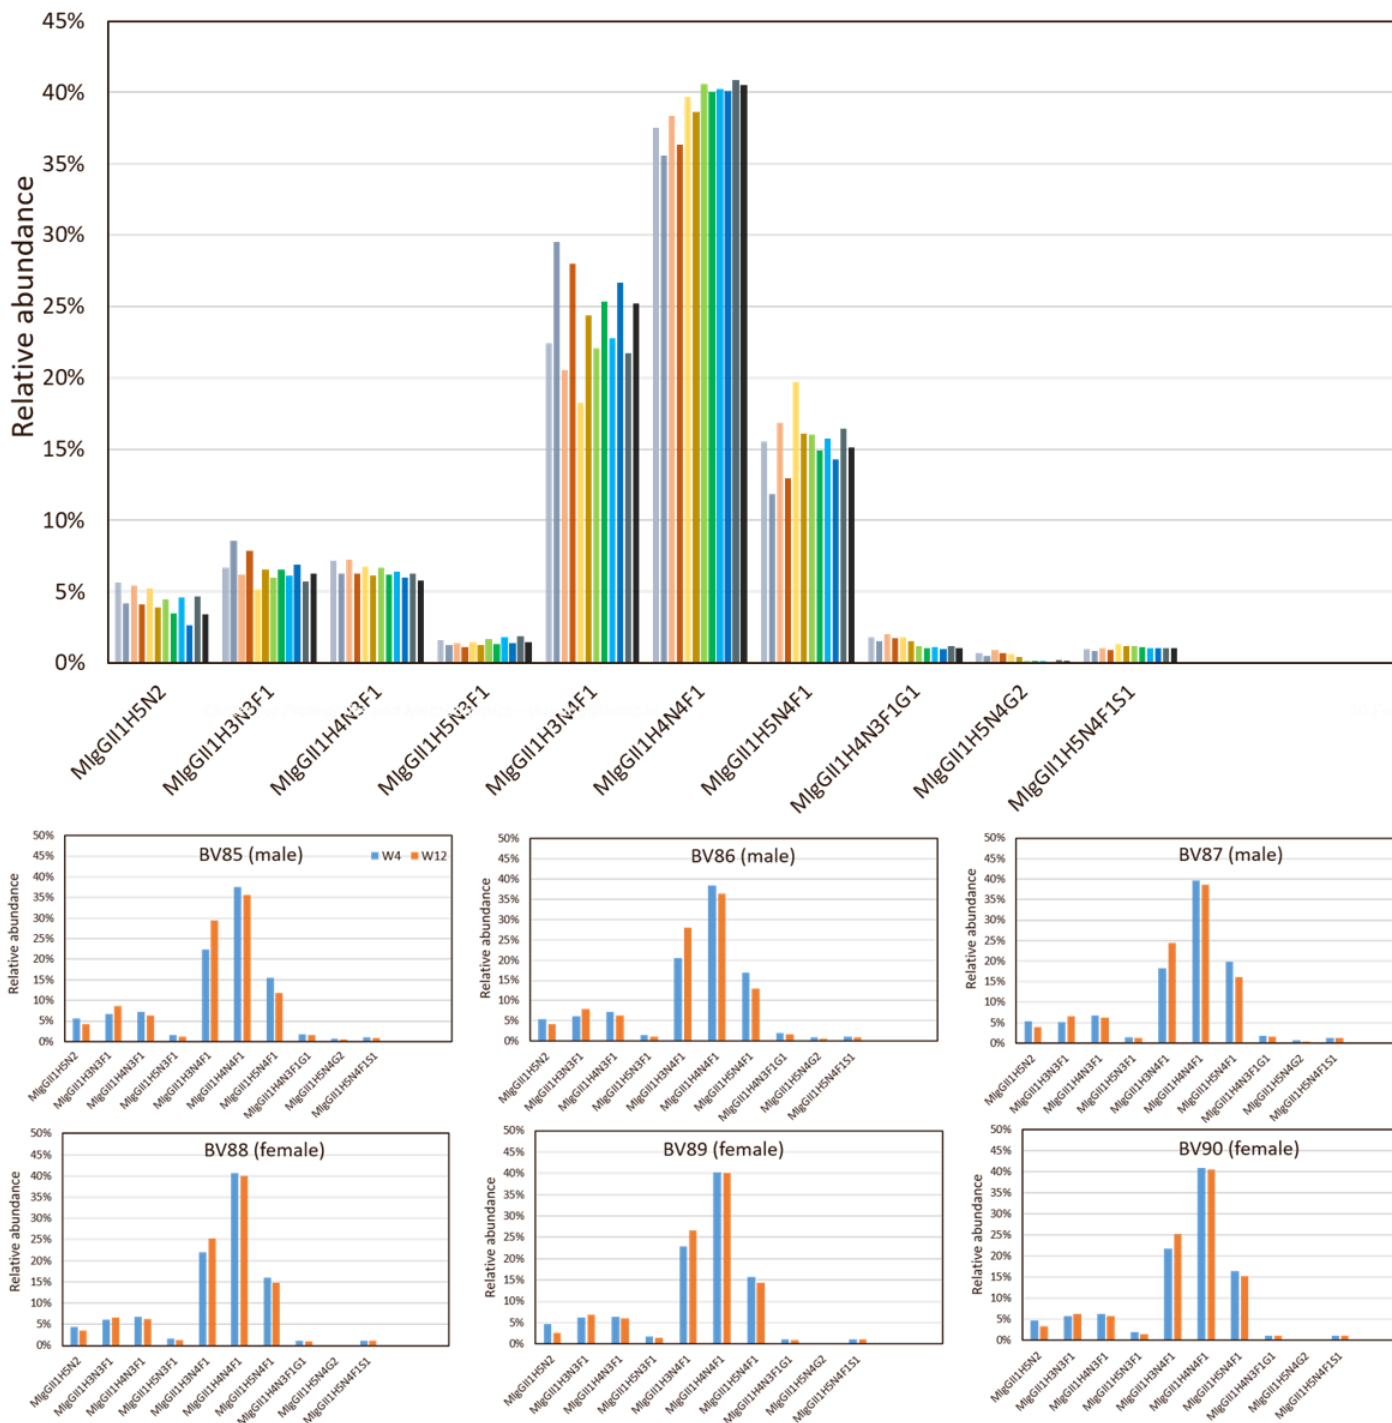

**Figure S6 Murine IgG2c Fc-glycosylation of AAV8 encoded antibodies.** The relative abundance of different glycosylation profiles is shown for each mouse represented as a bar following AAV8 transduction. The glycan structure, colour code and abbreviations are described in Fig. S5 .

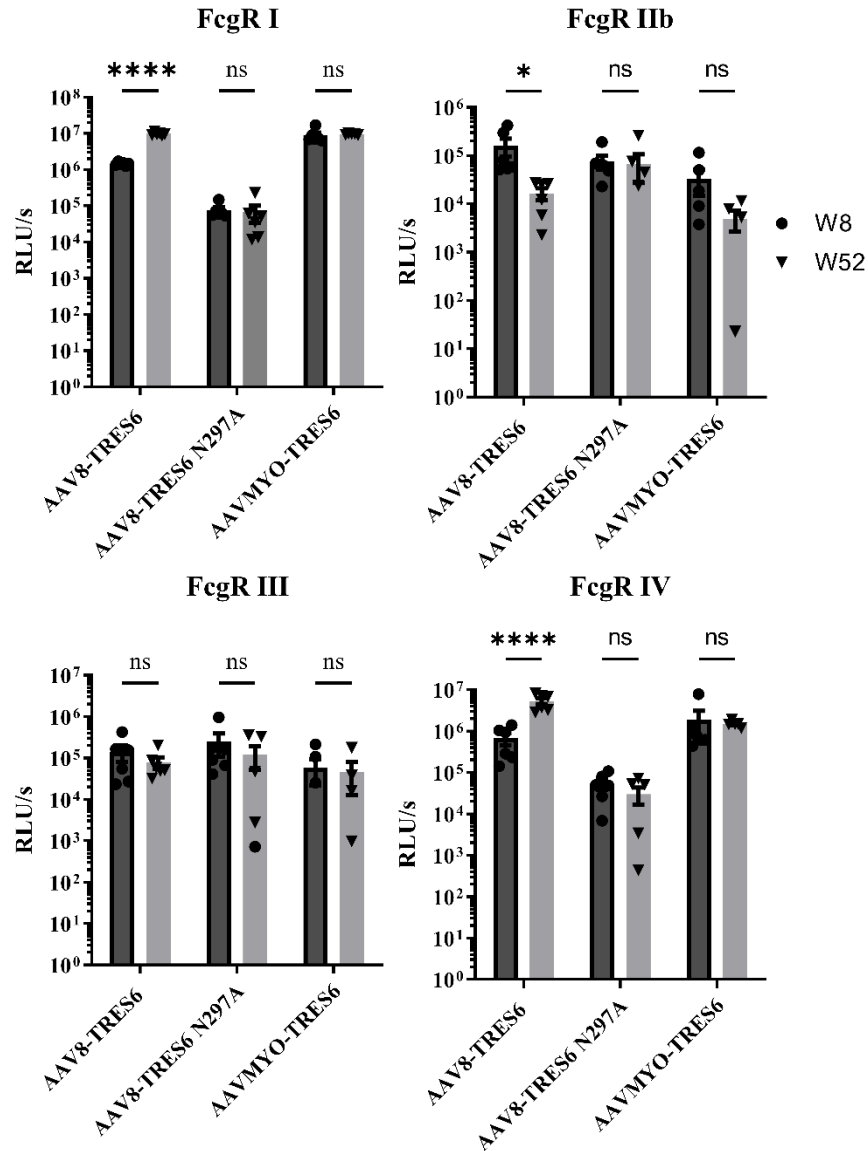

*Figure S7. Changes in Fc- $\gamma$  receptor binding over time. The binding of serum TRES6 antibodies to the Fc- $\gamma$  receptors RI - RIV was compared eight (black) and 52 (grey) weeks after injection of the indicated vector particles (group size  $n = 6$ ,  $\text{♀} = 3$ ,  $\text{♂} = 3$ ). Statistical evaluation of the data was performed by Kruskal-Wallis test (one-way ANOVA) and Dunn's Pairwise Multiple Comparison Procedures as post-hoc test (\*:  $p \leq 0.01$ ; \*\*\*\*:  $p \leq 0.0001$ ; ns: non-significant)*

*Table S1. Transcriptomic expression analysis of genes associated with glycosylation pathways. The transcriptome data of hepatocytes was compared between female and male C57BL/6 mice (Bioproject accessions PRJNA873076 (male C57BL/6J)*

and PRJNA893576 (female C57BL/6J)). The RNAseq data from tissue harvested at time point 6h [71] was analysed with CLC Genomic Workbench version 23 for differential expression in 2 groups (female vs male) with a focus on glycosylation pathway genes and was further condensed to N-Glycosylation related genes according to [58]. Differences, that were significant after Bonferroni-correction are highlighted in green.

|                                       | Name            | Max group mean | Log fold change | Fold change | P-value  | FDR p-value | Bonferroni             | GeneID                 |
|---------------------------------------|-----------------|----------------|-----------------|-------------|----------|-------------|------------------------|------------------------|
| Specific initiation                   | <i>Stt3a</i>    | 30,444         | 0,204           | 1,152       | 0,032    | 0,098       | 1                      | <a href="#">16430</a>  |
|                                       | <i>Uggt1</i>    | 12,676         | -0,228          | -1,171      | 0,029    | 0,093       | 1                      | <a href="#">320011</a> |
|                                       | <i>Uggt2</i>    | 0,568          | -0,019          | -1,014      | 0,861    | 0,923       | 1                      | <a href="#">66435</a>  |
| Specific core extension               | <i>Mgat1</i>    | 19,5941        | 0,2786          | 1,2130      | 1,65E-05 | 0,0002      | 0,4183                 | <a href="#">17308</a>  |
|                                       | <i>Mgat2</i>    | 31,2620        | -0,0691         | -1,0490     | 0,4916   | 0,6630      | 1                      | <a href="#">217664</a> |
|                                       | <i>Mgat3</i>    | 0,0491         | -0,0363         | -1,0255     | 0,9160   | 0,9528      | 1                      | <a href="#">17309</a>  |
|                                       | <i>Mgat4a</i>   | 0,2715         | -0,0399         | -1,0280     | 0,8012   | 0,8873      | 1                      | <a href="#">269181</a> |
|                                       | <i>Mgat4b</i>   | 31,4568        | 0,4864          | 1,4010      | 6,55E-11 | 2,58E-09    | 1,66E-06               | <a href="#">103534</a> |
|                                       | <i>Mgat4c</i>   | 0,0028         | 1,7551          | 3,3754      | 0,0334   | 0,1021      | 1                      | <a href="#">67569</a>  |
|                                       | <i>Mgat5</i>    | 2,1014         | -0,3084         | -1,2384     | 0,0041   | 0,0193      | 1                      | <a href="#">107895</a> |
|                                       | <i>Fut8</i>     | 3,4095         | 0,7054          | 1,6306      | 1,99E-10 | 7,17E-09    | 5,06E-06               | <a href="#">53618</a>  |
|                                       | <i>Dpm1</i>     | 20,4877        | 0,2721          | 1,2076      | 0,0051   | 0,0227      | 1                      | <a href="#">13480</a>  |
|                                       | <i>Dpagt1</i>   | 20,5655        | 0,1840          | 1,1360      | 0,0144   | 0,0529      | 1                      | <a href="#">13478</a>  |
|                                       | <i>Alg13</i>    | 1,9034         | -0,0261         | -1,0183     | 0,7897   | 0,8793      | 1                      | <a href="#">67574</a>  |
|                                       | <i>Alg14</i>    | 11,9072        | 0,2675          | 1,2037      | 0,0001   | 0,0012      | 1                      | <a href="#">66789</a>  |
|                                       | <i>Alg1</i>     | 20,8698        | 0,2630          | 1,2000      | 0,0001   | 0,0011      | 1                      | <a href="#">208211</a> |
|                                       | <i>Alg2</i>     | 9,8843         | 0,0005          | 1,0004      | 0,9964   | 0,9979      | 1                      | <a href="#">56737</a>  |
|                                       | <i>Alg11</i>    | 9,6640         | -0,1399         | -1,1018     | 0,0406   | 0,1180      | 1                      | <a href="#">207958</a> |
|                                       | <i>Alg12</i>    | 5,6362         | -0,0340         | -1,0239     | 0,8219   | 0,9008      | 1                      | <a href="#">223774</a> |
|                                       | <i>Alg3</i>     | 2,7441         | 0,2450          | 1,1851      | 0,0077   | 0,0319      | 1                      | <a href="#">208624</a> |
|                                       | <i>Alg9</i>     | 6,8175         | 0,2603          | 1,1978      | 0,0003   | 0,0022      | 1                      | <a href="#">102580</a> |
|                                       | <i>Alg6</i>     | 4,4799         | 0,0671          | 1,0476      | 0,4945   | 0,6657      | 1                      | <a href="#">320438</a> |
|                                       | <i>Alg8</i>     | 2,4932         | 0,2011          | 1,1496      | 0,0351   | 0,1059      | 1                      | <a href="#">381903</a> |
| <i>Alg10b</i>                         | 11,7276         | -0,4610        | -1,3765         | 0,0014      | 0,0080   | 1           | <a href="#">380959</a> |                        |
| Non-specific Elongation and branching | <i>B3galt1</i>  | 7,4117         | -1,0744         | -2,1058     | 3,22E-11 | 1,32E-09    | 8,18E-07               | <a href="#">26877</a>  |
|                                       | <i>B3galt2</i>  | 0,0526         | 1,9852          | 3,9593      | 0,0011   | 0,0065      | 1                      | <a href="#">26878</a>  |
|                                       | <i>B3galt5</i>  | 0,0064         | 0,1707          | 1,1256      | 0,7395   | 0,8429      | 1                      | <a href="#">93961</a>  |
|                                       | <i>B4galnt3</i> | 0,6842         | -0,7903         | -1,7294     | 1,36E-05 | 0,0001      | 0,3445                 | <a href="#">330406</a> |
|                                       | <i>B4galnt4</i> | 0,0824         | -0,2320         | -1,1745     | 0,5860   | 0,7347      | 1                      | <a href="#">330671</a> |
|                                       | <i>B4galt1</i>  | 14,6070        | 0,1953          | 1,1450      | 0,0186   | 0,0648      | 1                      | <a href="#">14595</a>  |
|                                       | <i>B4galt2</i>  | 0,1430         | 0,1757          | 1,1295      | 0,5140   | 0,6818      | 1                      | <a href="#">53418</a>  |
|                                       | <i>B4galt3</i>  | 7,5608         | 0,2810          | 1,2150      | 0,0009   | 0,0053      | 1                      | <a href="#">57370</a>  |



|                           |                   |          |         |         |          |          |                       |                        |
|---------------------------|-------------------|----------|---------|---------|----------|----------|-----------------------|------------------------|
|                           | <i>B4gal4</i>     | 0,8635   | 0,1607  | 1,1178  | 0,2606   | 0,4425   | 1                     | <a href="#">56375</a>  |
|                           | <i>B3gnt2</i>     | 14,1687  | -0,2142 | -1,1600 | 0,0069   | 0,0293   | 1                     | <a href="#">53625</a>  |
|                           | <i>B3gnt3</i>     | 1,4823   | 0,2108  | 1,1574  | 0,1978   | 0,3685   | 1                     | <a href="#">72297</a>  |
|                           | <i>B3gnt4</i>     | 0,0463   | 0,2220  | 1,1663  | 0,6064   | 0,7517   | 1                     | <a href="#">231727</a> |
|                           | <i>B3gnt7</i>     | 0,0527   | 1,3717  | 2,5878  | 0,0036   | 0,0173   | 1                     | <a href="#">227327</a> |
|                           | <i>B3gnt8</i>     | 0,9237   | 0,3423  | 1,2678  | 0,0635   | 0,1653   | 1                     | <a href="#">232984</a> |
|                           | <i>B3gnt9</i>     | 0,4543   | 0,5472  | 1,4613  | 0,0246   | 0,0808   | 1                     | <a href="#">97440</a>  |
|                           | <i>Gcnt2</i>      | 4,3058   | 0,1361  | 1,0990  | 0,1203   | 0,2619   | 1                     | <a href="#">14538</a>  |
|                           | <i>Gcnt7</i>      | 0,0370   | -0,6004 | -1,5161 | 0,1933   | 0,3627   | 1                     | <a href="#">654821</a> |
|                           |                   |          |         |         |          |          |                       |                        |
| Non-specific<br>- capping | <i>St3gal1</i>    | 35,5026  | 0,2975  | 1,2290  | 0,0120   | 0,0456   | 1                     | <a href="#">20442</a>  |
|                           | <i>St3gal2</i>    | 0,7200   | 0,3402  | 1,2659  | 0,0193   | 0,0668   | 1                     | <a href="#">20444</a>  |
|                           | <i>St3gal3</i>    | 34,3926  | -0,2078 | -1,1549 | 0,0156   | 0,0564   | 1                     | <a href="#">20441</a>  |
|                           | <i>St3gal4</i>    | 13,6150  | 0,2841  | 1,2176  | 0,0019   | 0,0103   | 1                     | <a href="#">20443</a>  |
|                           | <i>St3gal5</i>    | 121,7287 | 0,4852  | 1,3998  | 0,0106   | 0,0415   | 1                     | <a href="#">20454</a>  |
|                           | <i>St3gal6</i>    | 2,9770   | 2,1123  | 4,3239  | 2,91E-58 | 2,02E-55 | 7,40E-54              | <a href="#">54613</a>  |
|                           | <i>St6gal1</i>    | 30,9089  | 0,4075  | 1,3264  | 0,0012   | 0,0067   | 1                     | <a href="#">20440</a>  |
|                           | <i>St6gal2</i>    | 0,0005   | -0,0398 | -1,0279 | 0,9606   | #NV      | 1                     | <a href="#">240119</a> |
|                           | <i>St6galnac1</i> | 0,0027   | 0,9048  | 1,8723  | 0,2966   | 0,4767   | 1                     | <a href="#">20445</a>  |
|                           | <i>St6galnac2</i> | 0,5702   | 0,4438  | 1,3602  | 0,0108   | 0,0420   | 1                     | <a href="#">20446</a>  |
|                           | <i>St6galnac3</i> | 0,0677   | -0,0643 | -1,0456 | 0,7574   | 0,8561   | 1                     | <a href="#">20447</a>  |
|                           | <i>St6galnac4</i> | 1,0375   | 1,0585  | 2,0827  | 3,68E-08 | 7,99E-07 | 0,0009                | <a href="#">20448</a>  |
|                           | <i>St6galnac5</i> | 0,0045   | 0,9071  | 1,8753  | 0,2936   | 0,4751   | 1                     | <a href="#">26938</a>  |
|                           | <i>St6galnac6</i> | 31,5668  | 0,1761  | 1,1299  | 0,0755   | 0,1879   | 1                     | <a href="#">50935</a>  |
|                           | <i>St8sia1</i>    | 0,0261   | -0,8568 | -1,8110 | 0,0106   | 0,0415   | 1                     | <a href="#">20449</a>  |
|                           | <i>St8sia2</i>    | 0,0111   | -0,1304 | -1,0946 | 0,7738   | 0,8678   | 1                     | <a href="#">20450</a>  |
|                           | <i>St8sia3</i>    | 0,1751   | 0,2352  | 1,1771  | 0,3067   | 0,4874   | 1                     | <a href="#">20451</a>  |
|                           | <i>St8sia4</i>    | 0,2685   | -0,1469 | -1,1072 | 0,4313   | 0,6106   | 1                     | <a href="#">20452</a>  |
|                           | <i>St8sia5</i>    | 0,0457   | 1,9001  | 3,7325  | 0,0058   | 0,0253   | 1                     | <a href="#">225742</a> |
|                           | <i>St8sia6</i>    | 0,0139   | 0,7018  | 1,6265  | 0,1524   | 0,3098   | 1                     | <a href="#">241230</a> |
|                           | <i>B4galnt2</i>   | 0,2328   | -1,2107 | -2,3144 | 0,0053   | 0,0236   | 1                     | <a href="#">14422</a>  |
|                           | <i>A4gnt</i>      | 0,0284   | -0,8285 | -1,7758 | 0,1358   | 0,2860   | 1                     | <a href="#">333424</a> |
|                           | <i>Abo</i>        | 0,0008   | 0,3042  | 1,2347  | 0,7442   | #NV      | 1                     | <a href="#">80908</a>  |
|                           | <i>B3gat1</i>     | 0,0107   | 0,0451  | 1,0318  | 0,9284   | 0,9604   | 1                     | <a href="#">76898</a>  |
|                           | <i>B3gat2</i>     | 0,1680   | -0,2887 | -1,2215 | 0,2669   | 0,4498   | 1                     | <a href="#">280645</a> |
|                           | <i>Fut1</i>       | 0,0642   | -0,0016 | -1,0011 | 0,9970   | 0,9981   | 1                     | <a href="#">14343</a>  |
|                           | <i>Fut2</i>       | 0,0573   | -0,6928 | -1,6164 | 0,1051   | 0,2382   | 1                     | <a href="#">14344</a>  |
|                           | <i>Fut4</i>       | 0,1065   | -0,3003 | -1,2314 | 0,3535   | 0,5362   | 1                     | <a href="#">14345</a>  |
|                           | <i>Fut7</i>       | 0,0605   | 0,4795  | 1,3942  | 0,2403   | 0,4209   | 1                     | <a href="#">14347</a>  |
|                           | <i>Fut9</i>       | 0,0015   | 0,6553  | 1,5749  | 0,3327   | 0,5158   | 1                     | <a href="#">14348</a>  |
|                           | <i>Fut10</i>      | 0,1522   | 0,2088  | 1,1557  | 0,2744   | 0,4572   | 1                     | <a href="#">171167</a> |
| <i>Fut11</i>              | 2,3442            | -0,0367  | -1,0258 | 0,7611  | 0,8584   | 1        | <a href="#">73068</a> |                        |

|                             |                |        |         |         |        |        |     |                        |
|-----------------------------|----------------|--------|---------|---------|--------|--------|-----|------------------------|
| Non-specific<br>- Sulfation | <i>Gal3st1</i> | 1,6974 | 0,0572  | 1,0404  | 0,8224 | 0,9011 | 1   | <a href="#">53897</a>  |
|                             | <i>Chst8</i>   | 0,0422 | 0,4904  | 1,4048  | 0,2458 | 0,4279 | 1   | <a href="#">68947</a>  |
|                             | <i>Chst9</i>   | 0,0254 | 0,9270  | 1,9014  | 0,0860 | 0,2062 | 1   | <a href="#">71367</a>  |
|                             | <i>Gal3st3</i> | 0,0068 | 0,1366  | 1,0993  | 0,8327 | 0,9085 | 1   | <a href="#">545276</a> |
|                             | <i>Gal3st2</i> | 0,1103 | -0,9146 | -1,8850 | 0,0888 | 0,2108 | 1   | <a href="#">381334</a> |
|                             | <i>Gal3st4</i> | 0,1266 | 0,3962  | 1,3160  | 0,1248 | 0,2689 | 1   | <a href="#">330217</a> |
|                             | <i>Chst1</i>   | 0,1025 | 1,0561  | 2,0792  | 0,0035 | 0,0167 | 1   | <a href="#">76969</a>  |
|                             | <i>Chst3</i>   | 0,0499 | 0,3853  | 1,3061  | 0,2705 | 0,4532 | 1   | <a href="#">53374</a>  |
|                             | <i>Chst5</i>   | 0,0000 | #NV     | #NV     | #NV    | #NV    | #NV | <a href="#">56773</a>  |
|                             | <i>Chst7</i>   | 0,5739 | -0,0406 | -1,0285 | 0,8336 | 0,9089 | 1   | <a href="#">60322</a>  |
|                             | <i>Chst4</i>   | 0,2439 | 0,9542  | 1,9375  | 0,0223 | 0,0748 | 1   | <a href="#">26887</a>  |
|                             | <i>Chst2</i>   | 0,9032 | 0,4014  | 1,3208  | 0,0117 | 0,0448 | 1   | <a href="#">54371</a>  |
|                             | <i>Chst10</i>  | 0,0709 | 0,8260  | 1,7728  | 0,0352 | 0,1061 | 1   | <a href="#">98388</a>  |

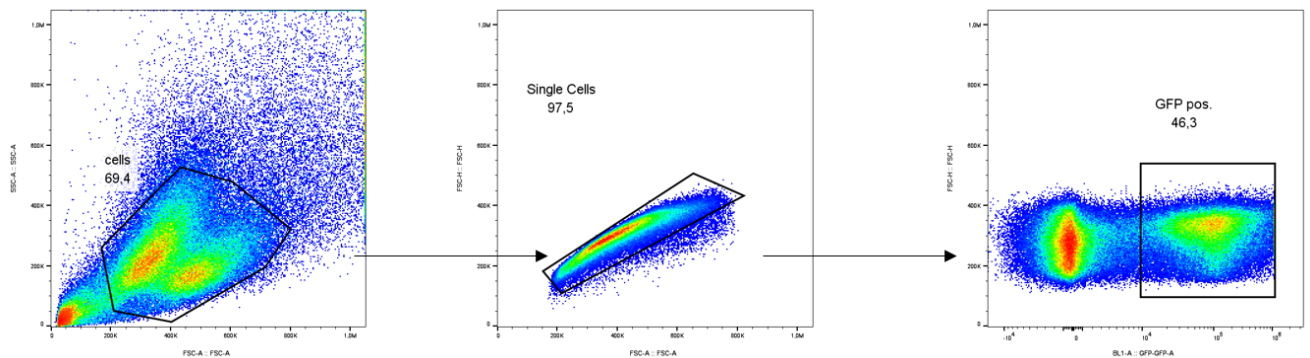

**Figure S8.** Gating strategy for antibody binding. Shown is the gating strategy for the analysis of antibody binding to Spike expressing cells.

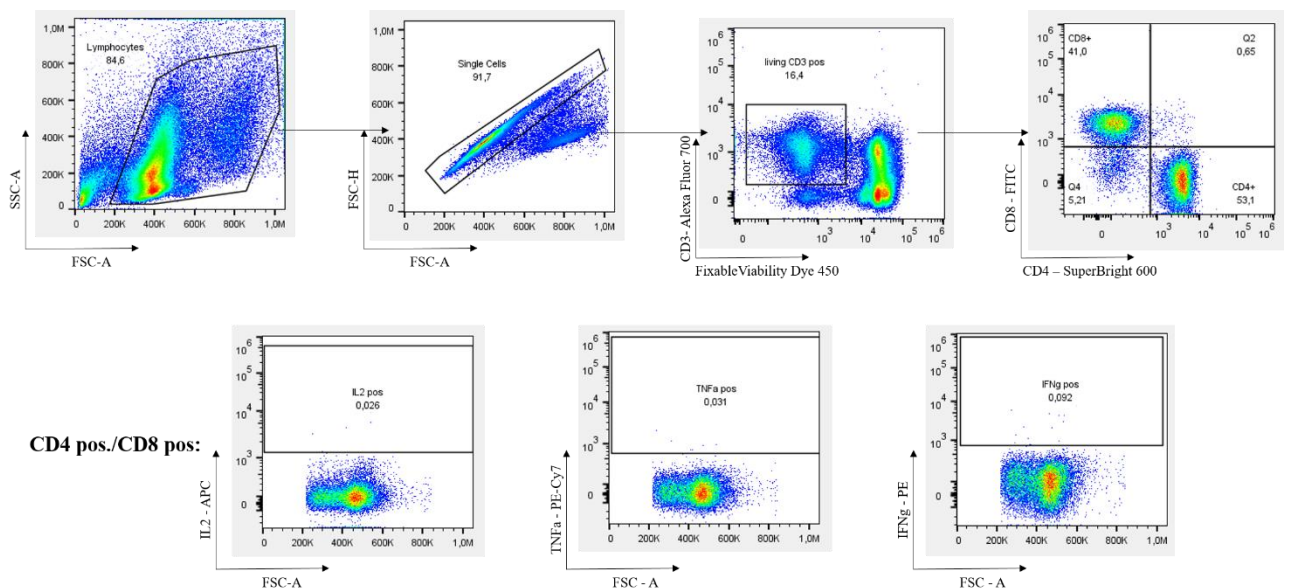

**Figure S9.** Gating strategy for the analysis of anti-drug T cell responses. Shown is the gating strategy for the identification of CD4+ and CD8+ T cells. Within these populations, the frequency of IL2 positive, TNF $\alpha$  positive or IFN $\gamma$  positive cells was determined.
