# Supplementary material for: Influence of AAV vector tropism on long-term expression and Fc-γ receptor binding of an antibody targeting SARS-CoV-2
Source: PubMed Central journal article supplement (PMC11250830; doi:10.1038/s42003-024-06529-3), 2024-07-16
Supplement: 42003_2024_6529_MOESM3_ESM.pdf [file 42003_2024_6529_MOESM3_ESM.pdf]

## **Description of Additional Supplementary Files**

File name: Supplementary Data 1

Description: The source data behind the graphs in the paper
